# Supplementary material for: Arabidopsis vascular complexity and connectivity controls PIN-FORMED1 dynamics and lateral vein patterning during embryogenesis
Source: Oxford University Press journal article supplement (doi:10.1242/dev.197210), 2021-06-17
Supplement: dev197210supp.pdf [file dev197210supp.pdf]

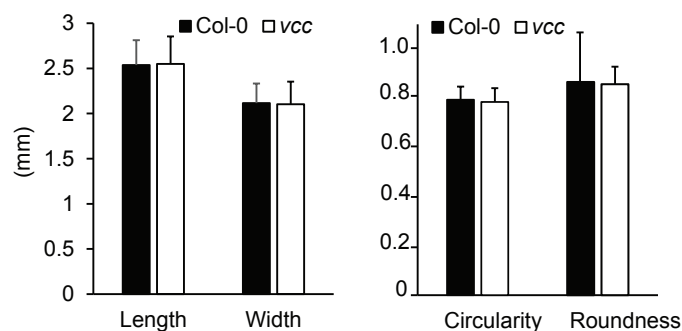

**Fig. S1.** Size and shape of wild-type and *vcc* cotyledons. (A) Length and width of cotyledons from seedlings of Col-0 and *vcc* at 8 days after germination. Mean + SD (n=100 cotyledons per genotype). (B) Shape parameters circularity and roundness in wild-type and *vcc* cotyledons; Mean + SD (n = 100 cotyledons per genotype).

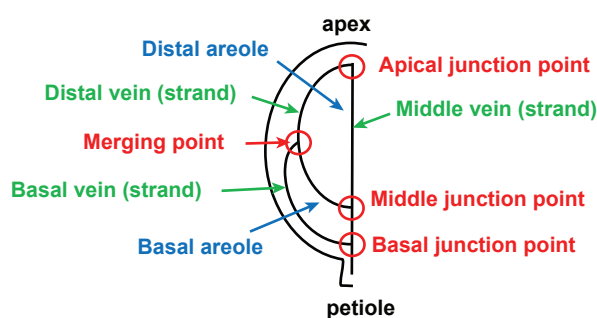

**Fig. S2.** Terminology to describe geometry of vein pattern in cotyledons. The diagram indicates veins and vein merging points in half of an *Arabidopsis* cotyledon. An areole is the area enclosed by veins. The term “strand” denotes developing veins consisting of pre-procambial/procambial cells.

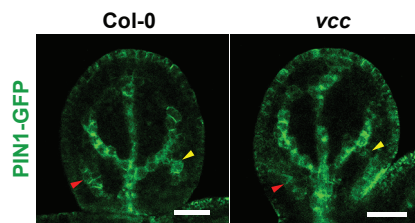

**Fig. S3.** Basal strand formation in wild type and *vcc* cotyledons. Basal strands originate from the first (yellow) or second (red) PIN1 domains in wild-type and *vcc* cotyledons (approximately 140  $\mu\text{m}$  in length). Scale bars = 30  $\mu\text{m}$ .

#### Nucleotide sequence

##### *PID*

226 CGCCICAT GCGTCGTATCGGCGCCGGCGACATCGGAACAGTTTAC 270

##### *pid-17*

226 CGCCICAT **G**GCGTCGTATCGGCGCCGGCGACATCGGAACAGTTTAC 271

##### *pid-18*

226 CGCCICAT **T**GCGTCGTATCGGCGCCGGCGACATCGGAACAGTTTAC 271

#### Deduced amino acid sequences

##### *PID*

76 RLMRRIGAGDIGTVY 90

##### *PID-17*

76 RLM**AS**YRRRRHRNSL 90

##### *PID-18*

76 RLM**AS**YRRRRHRNSL 90

**Fig. S4.** Identification of mutations in CRISPR/ CAS9-edited lines.

Nucleotide and deduced amino acid sequences of *PID*, *pid-17*, and *pid-18*. Under-lined nucleotides show the PAM sequence. Single nucleotide G and T (highlighted by red color) were inserted after the nucleotide 233 from the translation site in *pid-17* and *pid-18*, respectively. Predicted amino acid changes (highlighted in red) in *PID-17* and *PID-18* mutant proteins.

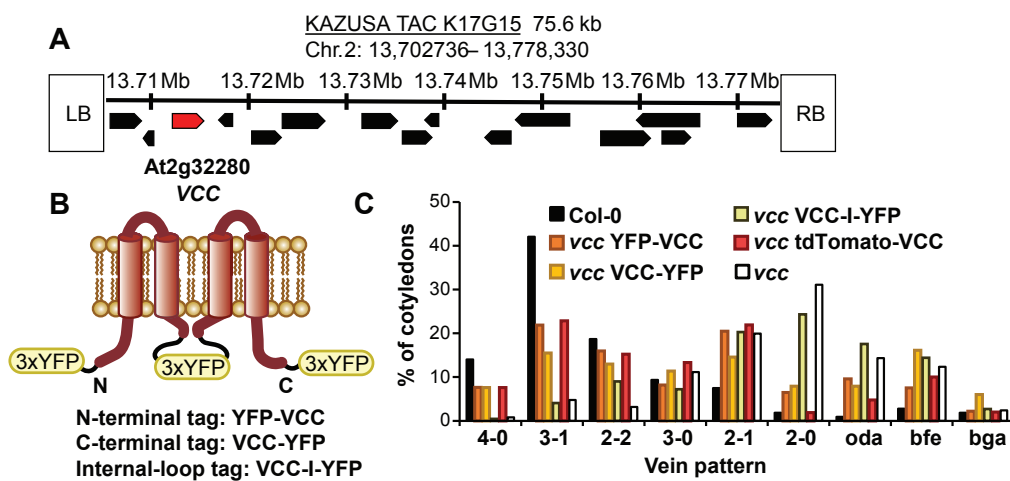

**Fig. S5.** Fluorescent protein-tagged VCC versions and rescue analysis. (A) The KAZUSA TAC clone K17G15 contains the VCC genomic sequence. (B) Predicted structure of VCC at a membrane and positions of the 3x-YFP tag. (C) Rescue analysis of 3x-YFP- and tdTomato-tagged VCC in the *vcc* mutant back-ground. Average of three independent transgenic lines are shown, except for VCC-I-YFP for which two lines were analyzed.

**Supplementary Table 1: Statistical analyses of vein network complexity and vein disconnections**

| Chi-squared test: vein network complexity (Fig 5a) |             |                  |
|----------------------------------------------------|-------------|------------------|
| Comparison                                         | Raw P-value | Adjusted P-value |
| Col-0 vs En-1                                      | 0.2471      | 0.2745           |
| Col-0 vs vcc                                       | 0.0001      | 0.0001           |
| Col-0 vs <i>pin1-1</i>                             | 0.0000      | 0.0001           |
| Col-0 vs vcc <i>pin1-1</i>                         | 0.0000      | 0.0000           |
| En-1 vs vcc                                        | 0.0043      | 0.0071           |
| En-1 vs <i>pin1-1</i>                              | 0.0032      | 0.0064           |
| En-1 vs vcc <i>pin1-1</i>                          | 0.0000      | 0.0000           |
| vcc vs <i>pin1-1</i>                               | 0.8781      | 0.8781           |
| vcc vs vcc <i>pin1-1</i>                           | 0.0289      | 0.0414           |
| <i>pin1-1</i> vs vcc <i>pin1-1</i>                 | 0.0541      | 0.0676           |

| Chi-squared test: complexity (Fig 5b) |             |                  |
|---------------------------------------|-------------|------------------|
| Comparison                            | Raw P-value | Adjusted P-value |
| Col-0 vs vcc                          | 0.0000      | 0.0000           |
| Col-0 vs <i>pid-14</i>                | 0.0000      | 0.0000           |
| Col-0 vs <i>pid-17</i>                | 0.0000      | 0.0000           |
| Col-0 vs vcc <i>pid-18</i>            | 0.0000      | 0.0000           |
| vcc vs <i>pid-14</i>                  | 0.4684      | 0.5855           |
| vcc vs <i>pid-17</i>                  | 0.0553      | 0.1105           |
| vcc vs vcc <i>pid-18</i>              | 0.7509      | 0.8343           |
| <i>pid-14</i> vs <i>pid-17</i>        | 0.2265      | 0.3775           |
| <i>pid-14</i> vs vcc <i>pid-18</i>    | 1.0000      | 1                |
| <i>pid-17</i> vs vcc <i>pid-18</i>    | 0.2992      | 0.4274           |

| Chi-squared test: connectivity related (Fig 5a) |             |                  |
|-------------------------------------------------|-------------|------------------|
| Comparison                                      | Raw P-value | Adjusted P-value |
| Col-0 vs En-1                                   | 0.1049      | 0.1748           |
| Col-0 vs vcc                                    | 0.0008      | 0.0038           |
| Col-0 vs <i>pin1-1</i>                          | 0.0028      | 0.0092           |
| Col-0 vs vcc <i>pin1-1</i>                      | 0.0000      | 0.0003           |
| En-1 vs vcc                                     | 0.0767      | 0.1533           |
| En-1 vs <i>pin1-1</i>                           | 0.1356      | 0.1938           |
| En-1 vs vcc <i>pin1-1</i>                       | 0.0065      | 0.0162           |
| vcc vs <i>pin1-1</i>                            | 0.8665      | 0.8665           |
| vcc vs vcc <i>pin1-1</i>                        | 0.3482      | 0.3869           |
| <i>pin1-1</i> vs vcc <i>pin1-1</i>              | 0.2573      | 0.3216           |

| Chi-squared test: connectivity (Fig 5b) |             |                  |
|-----------------------------------------|-------------|------------------|
| Comparison                              | Raw P-value | Adjusted P-value |
| Col-0 vs vcc                            | 0.0001      | 0.0002           |
| Col-0 vs <i>pid-14</i>                  | 0.0000      | 0.0000           |
| Col-0 vs <i>pid-17</i>                  | 0.0044      | 0.0063           |
| Col-0 vs vcc <i>pid-18</i>              | 0.0000      | 0.0000           |
| vcc vs <i>pid-14</i>                    | 0.6702      | 0.6702           |
| vcc vs <i>pid-17</i>                    | 0.3701      | 0.4112           |
| vcc vs vcc <i>pid-18</i>                | 0.0000      | 0.0000           |
| <i>pid-14</i> vs <i>pid-17</i>          | 0.1442      | 0.1803           |
| <i>pid-14</i> vs vcc <i>pid-18</i>      | 0.0000      | 0.0000           |
| <i>pid-17</i> vs vcc <i>pid-18</i>      | 0.0000      | 0.0000           |
